# Supplementary material for: Physical Activity and Glycemic Control Status in Chinese Patients with Type 2 Diabetes: A Secondary Analysis of a Randomized Controlled Trial
Source: MDPI journal article supplement (doi:10.3390/ijerph18084292), 2021-04-18
Supplement: s1 [file s1]

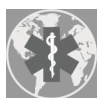

**Table S1.** Baseline characteristics of the study participants by intervention status.

| Characteristics at Baseline                         | All Subjects<br>(N = 799) | Intervention Groups          |                    |                            | Control Arm<br>(N = 200) | P-Values <sup>c</sup> |
|-----------------------------------------------------|---------------------------|------------------------------|--------------------|----------------------------|--------------------------|-----------------------|
|                                                     |                           | Health Literacy<br>(N = 200) | Exercise (N = 200) | Comprehensive<br>(N = 199) |                          |                       |
| <b>Cluster</b>                                      | 8                         | 2                            | 2                  | 2                          | 2                        |                       |
| <b>Clinic sites</b>                                 | 35                        | 9                            | 9                  | 9                          | 8                        |                       |
| <b>Age (years) <sup>a</sup></b>                     | 66 (59, 71)               | 67 (60, 71)                  | 66 (60, 72)        | 66 (59, 72)                | 65 (59, 69)              | 0.06                  |
| <b>Male <sup>b</sup></b>                            | 45.2                      | 44.5                         | 48.0               | 45.2                       | 43.0                     | 0.79                  |
| <b>Educational level <sup>b</sup></b>               |                           |                              |                    |                            |                          | <0.001                |
| Primary school or below                             | 21.7                      | 19.6                         | 16.0               | 32.7                       | 18.5                     |                       |
| Junior high school                                  | 38.2                      | 39.2                         | 33.5               | 39.7                       | 40.5                     |                       |
| Senior high school                                  | 26.2                      | 29.1                         | 30.5               | 20.1                       | 25.0                     |                       |
| College and above                                   | 13.9                      | 12.1                         | 20.0               | 7.5                        | 16.0                     |                       |
| <b>Monthly income per capita (USD) <sup>b</sup></b> |                           |                              |                    |                            |                          | <0.001                |
| <308                                                | 14.6                      | 16.6                         | 6.1                | 21.1                       | 14.6                     |                       |
| 308-769                                             | 58.0                      | 58.3                         | 54.5               | 59.8                       | 59.6                     |                       |
| >769                                                | 27.4                      | 25.1                         | 39.4               | 19.1                       | 25.8                     |                       |
| <b>Tobacco smoking <sup>b</sup></b>                 | 15.7                      | 14.5                         | 12.1               | 16.5                       | 19.6                     | 0.20                  |
| <b>Alcohol drinking <sup>b</sup></b>                | 11.0                      | 11.7                         | 9.3                | 8.9                        | 14.3                     | 0.29                  |
| <b>Years of diabetes <sup>a</sup></b>               | 9.7 (5.1, 15.1)           | 10.4 (6.0, 16.1)             | 9.5 (4.8, 15.9)    | 9.6 (5.1, 14.6)            | 9.5 (5.2, 14.6)          | 0.31                  |
| <b>Medication use <sup>b</sup></b>                  |                           |                              |                    |                            |                          | 0.005                 |
| Diabetes pills only                                 | 63.8                      | 71.2                         | 64.2               | 58.6                       | 61.5                     |                       |
| Insulin shot only                                   | 8.6                       | 5.8                          | 6.9                | 8.7                        | 12.8                     |                       |
| Both                                                | 21.7                      | 17.8                         | 18.7               | 28.6                       | 21.6                     |                       |
| Neither                                             | 5.9                       | 5.2                          | 10.2               | 4.1                        | 4.1                      |                       |
| <b>HbA1c level <sup>a</sup></b>                     | 8.1 (7.5, 9.1)            | 8.1 (7.5, 9.3)               | 8.0 (7.5, 9.1)     | 8.1(7.7, 9.0)              | 8.2(7.5, 9.1)            | 0.69                  |
| <b>Health literacy <sup>a</sup></b>                 | 116 (108, 120)            | 116 (104, 120)               | 116 (104, 120)     | 113(97, 120)               | 116(113, 120)            | <0.001                |
| <b>Numeracy skill <sup>a</sup></b>                  | 80 (60, 100)              | 80 (80, 100)                 | 80 (80, 100)       | 80(60, 100)                | 100(80, 100)             | <0.001                |

<sup>a</sup> Continuous variables presented as median and interquartile range (IQR); <sup>b</sup> Categorical variables presented as percentage; <sup>c</sup> One-way analysis of variance (ANOVA) or Kruskal-Wallis tests for comparisons of continuous variables, chi-square tests for comparisons of categorical variables.

**Table S2.** Baseline intensity of exercise by HbA1c levels in the study participants.

| Type of PA                        | Men                      |                               |                            |                       | Women                    |                               |                             |                       |
|-----------------------------------|--------------------------|-------------------------------|----------------------------|-----------------------|--------------------------|-------------------------------|-----------------------------|-----------------------|
|                                   | HbA1c: <7.5%<br>(N = 62) | HbA1c: 7.5-8.9%<br>(N = 191 ) | HbA1c: ≥ 9.0%<br>(N = 99 ) | P-Values <sup>c</sup> | HbA1c: <7.5%<br>(N= 104) | HbA1c: 7.5-8.9%<br>(N = 213 ) | HbA1c: ≥ 9.0%<br>(N = 115 ) | P-values <sup>c</sup> |
| <b>Exercise</b>                   |                          |                               |                            |                       |                          |                               |                             |                       |
| Participation <sup>a</sup>        | 51.6                     | 48.7                          | 58.6                       | 0.28                  | 55.8                     | 45.5                          | 41.7                        | 0.10                  |
| Intensity (MET-h/w) <sup>b</sup>  |                          |                               |                            |                       |                          |                               |                             |                       |
| Moderate                          | 0 (0, 16.0)              | 0 (0, 12.0)                   | 3.3 (0, 18.7)              | 0.15                  | 0 (0, 12.0)              | 0 (0, 12.0)                   | 0 (0, 8.0)                  | 0.57                  |
| Vigorous                          | 0 (0, 0)                 | 0 (0, 0)                      | 0 (0, 0)                   | 0.61                  | 0 (0, 0)                 | 0 (0, 0)                      | 0 (0, 0)                    | 0.42                  |
| Total                             | 3.3 (0, 28.0)            | 0 (0, 24.0)                   | 10.3 (0, 28.0)             | 0.26                  | 6.7 (0, 24.0)            | 0 (0, 18.7)                   | 0 (0, 20.0)                 | 0.18                  |
| <b>Communting activities</b>      |                          |                               |                            |                       |                          |                               |                             |                       |
| Participation <sup>a</sup>        | 80.7                     | 79.6                          | 77.6                       | 0.62                  | 78.9                     | 68.1                          | 69.6                        | 0.13                  |
| Intensity (MET-h/w) <sup>b</sup>  |                          |                               |                            |                       |                          |                               |                             |                       |
| Cycling                           | 0 (0, 2.0)               | 0 (0, 4.0)                    | 0 (0, 0)                   | 0.91                  | 0 (0, 0)                 | 0 (0, 0)                      | 0 (0, 0)                    | 0.27                  |
| Walking                           | 22.0 (6.0, 28.0)         | 14.0 (4.0, 28.0)              | 14.0 (5.3, 28.0)           | 0.20                  | 20 (6.0, 28.0)           | 14.0 (0, 28.0)                | 14.0 (0, 28.0)              | 0.07                  |
| Total                             | 27.0 (8.0, 37.3)         | 18.0 (4.0, 28.0)              | 20.0 (10, 41.3)            | 0.26                  | 28 (6.7, 30.3)           | 14.0 (0, 28)                  | 14.0 (0, 28.0)              | 0.02                  |
| <b>Housework activities</b>       |                          |                               |                            |                       |                          |                               |                             |                       |
| Participation <sup>a</sup>        | 82.3                     | 82.2                          | 78.8                       | 0.53                  | 97.1                     | 92.5                          | 94.8                        | 0.24                  |
| Intensity (MET-h/w) <sup>b</sup>  | 21.0 (9.0, 42.0)         | 15.0 (4.0, 31.5)              | 15.0 (4.5, 30.0)           | 0.17                  | 42.0 (21, 52.5)          | 42.0 (21.0, 63.0)             | 37.5 (21, 45.5)             | 0.53                  |
| <b>Sedentariness <sup>b</sup></b> |                          |                               |                            |                       |                          |                               |                             |                       |
| MET/h-w                           | 28.0 (21.0, 42.0)        | 35.0 (21.0, 42.0)             | 29.2(21.0, 42.0)           | 0.85                  | 28.0 (17.5, 37.3)        | 28.0 (18.7, 42.0)             | 28.0 (21.0, 38.5)           | 0.77                  |

<sup>a</sup> Continuous variables presented as median and interquartile range (IQR); <sup>b</sup> Categorical variables presented as percentage; <sup>c</sup> One-way analysis of variance (ANOVA) or Kruskal-Wallis tests for comparisons of continuous variables, chi-square tests for comparisons of categorical variables.

|                                                                                                                                                                                                                                                                                                                                                                                                                                                                                                                                                                                                                                                                                                                                                                                                                                                                                                                                      |                                                                                                                                                                                                                                                                                                                                                                                                                                                                                                                                                                                                                                                                                                                                                                                                                                                                                                                                                                                                                    |
|--------------------------------------------------------------------------------------------------------------------------------------------------------------------------------------------------------------------------------------------------------------------------------------------------------------------------------------------------------------------------------------------------------------------------------------------------------------------------------------------------------------------------------------------------------------------------------------------------------------------------------------------------------------------------------------------------------------------------------------------------------------------------------------------------------------------------------------------------------------------------------------------------------------------------------------|--------------------------------------------------------------------------------------------------------------------------------------------------------------------------------------------------------------------------------------------------------------------------------------------------------------------------------------------------------------------------------------------------------------------------------------------------------------------------------------------------------------------------------------------------------------------------------------------------------------------------------------------------------------------------------------------------------------------------------------------------------------------------------------------------------------------------------------------------------------------------------------------------------------------------------------------------------------------------------------------------------------------|
| <p><b>BE ACTIVE</b></p> <p><b>Being active is good for your:</b></p> <ul style="list-style-type: none"> <li>• Heart</li> <li>• Blood pressure</li> <li>• Cholesterol</li> <li>• Sleep</li> <li>• Mood</li> <li>• Blood sugar</li> <li>• Weight</li> <li>• Overall energy</li> </ul>  <p><b>Walking is great exercise. If you have trouble walking, try these activities:</b></p> <ul style="list-style-type: none"> <li>• Lift weights while sitting in a chair. You can use soup cans.</li> <li>• Do stretches while sitting in a chair.</li> <li>• If you use a wheel chair, wheel yourself around using your arms and hands.</li> </ul>   <p>6 - Be Active</p> <p><b>1</b></p> | <p><b>BE ACTIVE</b></p> <p><b>Find Fun Ways to be More Active</b></p> <ul style="list-style-type: none"> <li>• Put on some music and dance.</li> </ul>   <ul style="list-style-type: none"> <li>• Take a 20-30 minute walk with a friend or walk your dog.</li> <li>• Find a family member or friend to be your exercise buddy. You can help each other stay with it.</li> <li>• Take the stairs instead of riding the elevator.</li> </ul>  <ul style="list-style-type: none"> <li>• Park farther away when you use a parking lot.</li> </ul> <p>6 - Be Active</p> <p><b>2</b></p>                                                                                                                                                                         |
| <p><b>BE ACTIVE</b></p> <p><b>Exercise Helps to Lower Your Blood Sugar</b></p> <ul style="list-style-type: none"> <li>• Exercise is great for your diabetes.</li> <li>• Sometimes activity or exercise can lower your blood sugar too much.</li> </ul> <p><b>Ask your doctor or nurse if you should:</b></p> <ul style="list-style-type: none"> <li>• Eat an extra snack before you exercise.</li> <li>• Take less insulin.</li> <li>• Check your blood sugar more often.</li> </ul>  <p>6 - Be Active</p> <p><b>3</b></p>                                                                                                                                                                                                                                                                                                                        | <p><b>BE ACTIVE</b></p> <p><b>I CAN DO IT!</b></p> <p><b>I will be more active every day!</b></p> <p>I will pick a goal from the list below to start this week and continue until I talk about it with my doctor, nurse, or dietitian. I will:</p> <p><input type="checkbox"/> _____</p> <p><input type="checkbox"/> _____</p> <p><input type="checkbox"/> _____</p> <ul style="list-style-type: none"> <li><input type="checkbox"/> Park farther away in a parking lot.</li> <li><input type="checkbox"/> Walk for 20-30 minutes on _____ days each week.</li> <li><input type="checkbox"/> Find a family member or friend to be an exercise buddy.</li> <li><input type="checkbox"/> Take stairs instead of the elevator.</li> <li><input type="checkbox"/> I will not watch TV or use the computer at home for more than 1 hour of each day.</li> </ul> <p>Copyright 2011 by Vanderbilt University. All rights reserved. Please contact authors for permission to use.</p> <p>6 - Be Active</p> <p><b>4</b></p> |

Figure S1. Exercise module in the PRIDE toolkit
